# Supplementary material
Source: PubMed Central journal article supplement (PMC4555644)
Supplement: Supp_Fig1.pdf [file Supp_Fig1.pdf]

## Supplementary Data

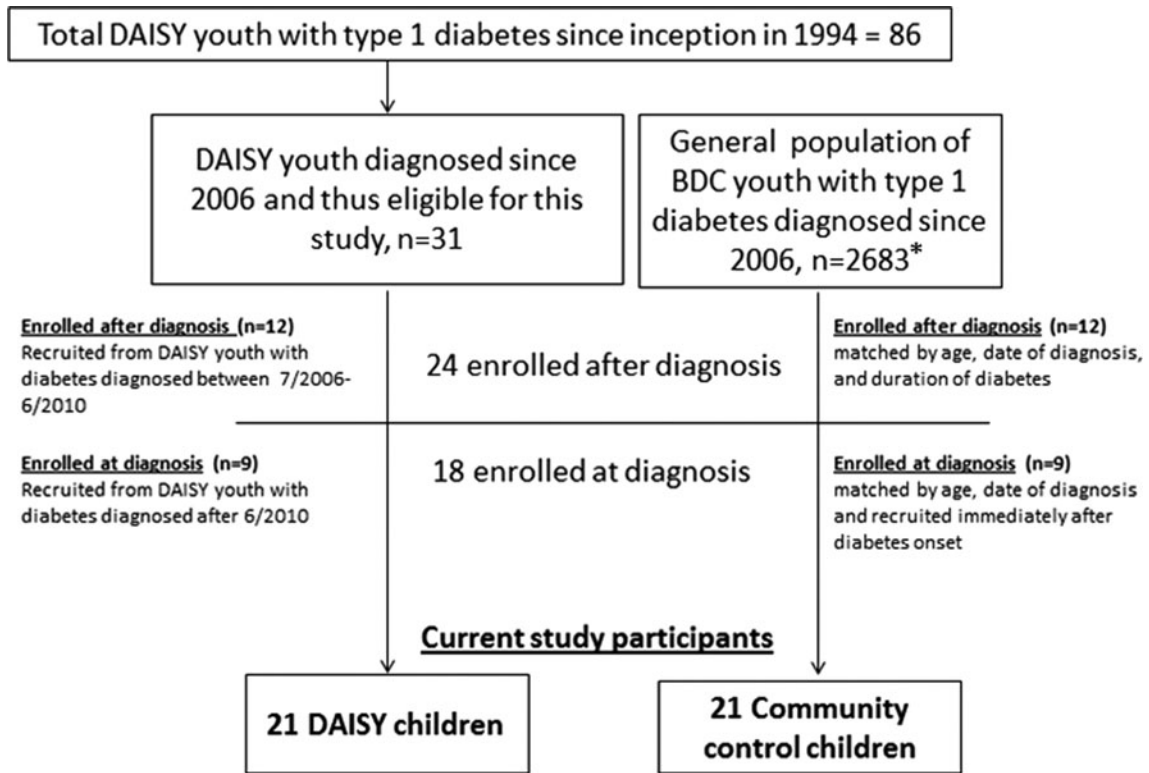

**SUPPLEMENTARY FIG. S1.** Enrollment flow diagram. \*Total number of youth in the general Barbara Davis Center (BDC) population diagnosed with type 1 diabetes; approximately 10% have negative diabetes antibodies at onset. Participants enrolled in this study were confirmed to have at least one autoantibody positive. DAISY, Diabetes Autoimmunity Study in the Young.
