# Supplementary material
Source: PubMed Central journal article supplement (PMC4555644)
Supplement: Supp_Table1.pdf [file Supp_Table1.pdf]

SUPPLEMENTARY TABLE S1. CONTINUOUS GLUCOSE MONITORING VARIABLES AND SUBGROUP DEMOGRAPHICS IN DIABETES AUTOIMMUNITY STUDY IN THE YOUNG VERSUS COMMUNITY PARTICIPANTS

| <i>Variable</i>                                   | <i>DAISY<br/>children (n=12)</i> | <i>Community<br/>children (n=11)</i> | <i>P value</i> |
|---------------------------------------------------|----------------------------------|--------------------------------------|----------------|
| Age (years)                                       | 12.7±2.2                         | 12.3±4.6                             | 0.69           |
| Male [ <i>n</i> (%)]                              | 9 (75)                           | 6 (55)                               | 0.4            |
| BMI z-score                                       | -0.1±0.9                         | 0.7±0.5                              | 0.02           |
| Family history of type 1 diabetes [ <i>n</i> (%)] | 5 (42)                           | 1 (9)                                | 0.16           |
| Years from diagnosis                              | 1.1±1.1                          | 2.1±1.6                              | 0.11           |
| A1c (%) at study enrollment                       | 8.2±2.4                          | 8.6±1.9                              | 0.75           |
| Glucose tests/day                                 | 3.8±1.0                          | 5.6±2.1                              | 0.06           |
| Insulin dose (units/kg/day)                       | 0.6±0.5                          | 0.7±0.4                              | 0.65           |
| IDAA1C <sup>a</sup>                               | 10.6±4.2                         | 11.3±2.5                             | 0.53           |
| Mean sensor glucose (mg/dL)                       |                                  |                                      |                |
| Overall                                           | 199±64                           | 165±38                               | 0.21           |
| Day <sup>b</sup>                                  | 194±66                           | 162±37                               | 0.41           |
| Night                                             | 214±71                           | 174±52                               | 0.19           |
| Minimum sensor glucose (mg/dL)                    |                                  |                                      |                |
| Overall                                           | 58±26                            | 48±12                                | 0.29           |
| Day <sup>b</sup>                                  | 58±26                            | 52±15                                | 0.65           |
| Night                                             | 119±57                           | 72±32                                | 0.01           |
| Maximum sensor glucose (mg/dL)                    |                                  |                                      |                |
| Overall                                           | 345±68                           | 344±76                               | 0.92           |
| Day <sup>b</sup>                                  | 344±68                           | 343±78                               | 0.97           |
| Night                                             | 319±93                           | 307±78                               | 0.7            |
| SD                                                | 69±27                            | 67±24                                | 0.93           |
| Coefficient of variation                          | 35±11                            | 40±9                                 | 0.17           |
| Sensor range (mg/dL)                              | 287±67                           | 296±80                               | 0.8            |
| AUC (mg/min/dL) <sup>c</sup>                      |                                  |                                      |                |
| Overall                                           | 8.6±2.8×10 <sup>5</sup>          | 7.0±1.6×10 <sup>5</sup>              | 0.19           |
| Day <sup>b</sup>                                  | 6.3±2.1×10 <sup>5</sup>          | 5.2±1.2×10 <sup>5</sup>              | 0.35           |
| Night                                             | 2.3±0.77×10 <sup>5</sup>         | 1.9±0.52×10 <sup>4</sup>             | 0.26           |
| Time spent (%)                                    |                                  |                                      |                |
| >200 mg/dL                                        | 40±30                            | 30±20                                | 0.19           |
| <70 mg/dL                                         | 0.0±0.0                          | 10±10                                | 0.11           |

<sup>a</sup>Insulin dose-adjusted hemoglobin A1c (IDAA1C), calculated as hemoglobin A1c (HbA1c) (in %)+(4×insulin dose [units/kg/day]).

<sup>b</sup>Day was defined as values between 6 a.m. and midnight.

<sup>c</sup>Area under the curve (AUC) was calculated by the trapezoidal rule.

BMI, body mass index; DAISY, Diabetes Autoimmunity Study in the Young.
